# Supplementary material for: Competition in Biofilms between Cystic Fibrosis Isolates of Pseudomonas aeruginosa Is Shaped by R-Pyocins
Source: PubMed Central journal article supplement (PMC6355985; doi:10.1128/mbio.01828-18), 2019-01-29
Supplement: mBio.01828-18-st001.pdf [file mBio.01828-18-st001.pdf]

|                   |      | PYOCINS OF TEST STRAINS |      |      |      |      |      |      |      |      |      |      |      |      |      |      |      |      |      |      |      |      |      |      |      |
|-------------------|------|-------------------------|------|------|------|------|------|------|------|------|------|------|------|------|------|------|------|------|------|------|------|------|------|------|------|
|                   |      | A007                    | A010 | A014 | A017 | A018 | A019 | A024 | A026 | A031 | A032 | A033 | A034 | A035 | A037 | P003 | P004 | P006 | P009 | P010 | P013 | P015 | P016 | P018 | P020 |
| INDICATOR STRAINS | A007 | -                       | -    | -    | -    | -    | -    | -    | +    | -    | -    | -    | -    | -    | -    | -    | -    | -    | -    | -    | -    | -    | -    | -    | -    |
|                   | A010 | +                       | -    | +    | -    | +    | -    | +    | -    | +    | +    | +    | -    | -    | -    | -    | +    | +    | -    | -    | +    | +    | -    | -    | +    |
|                   | A014 | +                       | -    | -    | -    | +    | -    | -    | +    | -    | +    | +    | -    | -    | -    | -    | -    | -    | -    | -    | +    | -    | -    | -    | -    |
|                   | A017 | +                       | -    | +    | -    | +    | -    | +    | -    | +    | +    | +    | -    | +    | -    | -    | +    | -    | -    | -    | +    | +    | -    | -    | +    |
|                   | A018 | -                       | -    | -    | -    | -    | -    | -    | +    | -    | -    | -    | -    | -    | -    | -    | -    | -    | -    | -    | -    | -    | -    | -    | -    |
|                   | A019 | +                       | -    | +    | -    | +    | -    | +    | -    | +    | +    | +    | -    | +    | -    | -    | +    | -    | -    | -    | +    | +    | -    | -    | +    |
|                   | A024 | +                       | -    | -    | -    | +    | -    | -    | +    | -    | +    | -    | -    | -    | -    | -    | -    | -    | -    | -    | -    | +    | -    | -    | -    |
|                   | A026 | +                       | -    | +    | -    | +    | -    | +    | -    | +    | +    | +    | -    | -    | -    | -    | +    | +    | -    | -    | +    | +    | +    | -    | -    |
|                   | A031 | -                       | -    | -    | -    | -    | -    | -    | -    | -    | -    | -    | -    | -    | -    | -    | -    | -    | -    | -    | -    | -    | -    | -    | -    |
|                   | A032 | -                       | -    | -    | -    | -    | -    | -    | +    | -    | -    | -    | -    | -    | -    | -    | -    | -    | -    | -    | -    | -    | -    | -    | -    |
|                   | A033 | +                       | -    | +    | -    | +    | -    | +    | -    | -    | +    | -    | -    | -    | -    | -    | -    | -    | -    | -    | -    | -    | -    | -    | +    |
|                   | A034 | -                       | -    | -    | -    | -    | -    | -    | -    | -    | -    | -    | -    | -    | -    | -    | -    | -    | -    | -    | -    | -    | -    | -    | -    |
|                   | A035 | +                       | -    | +    | -    | +    | -    | +    | -    | +    | +    | +    | -    | -    | -    | -    | -    | -    | -    | -    | -    | -    | +    | -    | +    |
|                   | A037 | +                       | -    | +    | -    | +    | -    | +    | -    | +    | +    | -    | -    | -    | -    | -    | -    | -    | -    | -    | -    | -    | -    | -    | +    |
|                   | P003 | -                       | -    | -    | -    | -    | -    | -    | +    | -    | -    | -    | -    | -    | -    | -    | -    | -    | -    | -    | -    | -    | -    | -    | -    |
|                   | P004 | -                       | -    | -    | -    | -    | -    | -    | -    | -    | -    | -    | -    | -    | -    | -    | -    | -    | -    | -    | -    | -    | -    | -    | -    |
|                   | P006 | +                       | -    | +    | -    | +    | -    | +    | -    | +    | +    | -    | -    | -    | -    | -    | -    | -    | -    | -    | -    | -    | -    | -    | +    |
|                   | P009 | +                       | -    | +    | -    | +    | -    | +    | -    | -    | +    | -    | -    | -    | -    | -    | -    | -    | -    | -    | -    | +    | -    | -    | +    |
|                   | P010 | -                       | -    | -    | -    | -    | -    | -    | +    | -    | -    | -    | -    | -    | -    | -    | -    | -    | -    | -    | -    | -    | -    | -    | -    |
|                   | P013 | -                       | -    | -    | -    | -    | -    | -    | +    | -    | -    | -    | -    | -    | -    | -    | -    | -    | -    | -    | -    | -    | -    | -    | -    |
| P015              | +    | -                       | +    | -    | +    | -    | +    | -    | +    | +    | +    | -    | -    | -    | -    | -    | -    | -    | -    | -    | -    | -    | -    | +    |      |
| P016              | +    | -                       | +    | -    | +    | -    | +    | +    | +    | +    | +    | -    | -    | -    | -    | -    | -    | -    | -    | -    | -    | -    | -    | +    |      |
| P018              | +    | -                       | +    | -    | +    | -    | +    | +    | +    | +    | +    | -    | -    | -    | -    | -    | -    | -    | -    | -    | -    | -    | -    | -    |      |
| P020              | +    | -                       | -    | -    | +    | -    | -    | +    | -    | +    | -    | -    | -    | -    | -    | -    | -    | -    | -    | +    | -    | -    | -    | -    |      |

**Table S1.** Interactions of 24 clinical *P. aeruginosa* strains using a spot test assay of biological activity. Vertical columns show the pyocin activities of each test strain while the rows show each isolate as an indicator strain. Pairwise strain antagonism are represented as dumb bells. Red dumb bells for pairwise activities having A026 as a competing member while the blue dumb bell represents reciprocal killing between A033 and A014 (+ = lethal activity shown by zone clearance, - = no activity).
